# Supplementary material for: Dual hydrophilic and salt responsive schizophrenic block copolymers – synthesis and study of self-assembly behavior
Source: Royal Society of Chemistry journal article supplement (doi:10.1039/c4py01113a), 2014-09-25
Supplement: c4py01113a1.pdf [file c4py01113a1.pdf]

Supplementary Material (ESI) for Polymer Chemistry  
This journal is © The Royal Society of Chemistry 2001

## Dual hydrophilic and salt responsive schizophrenic block copolymers – synthesis and study of self-assembly behaviour

Vivek Arjunan Vasantha,<sup>\*a</sup> Satyasankar Jana,<sup>a</sup> Serina Siew-Chen Lee,<sup>b</sup> Chin-Sing Lim,<sup>b</sup>  
Serena Lay-Ming Teo,<sup>b</sup> Anbanandam Parthiban<sup>\*a</sup> and Julius G. Vancso<sup>a,c</sup>

<sup>a</sup>Institute of Chemical and Engineering Sciences (ICES), Agency for Science, Technology and Research (A\*STAR), 1 Pesek Road, Jurong Island, Singapore 627833.

<sup>b</sup>Tropical Marine Science Institute, National University of Singapore, 18 Kent Ridge Road, Singapore 119227

<sup>c</sup>MESA+ Research Institute for Nanotechnology, Faculty of Science and Technology, University of Twente, P. O. Box 217, 7500 AE Enschede, The Netherlands.

E-mail: [vivek\\_vasantha@ices.a-star.edu.sg](mailto:vivek_vasantha@ices.a-star.edu.sg); [aparthiban@ices.a-star.edu.sg](mailto:aparthiban@ices.a-star.edu.sg)

**Keywords:** Dual hydrophilic block copolymer, zwitterionic polymer, polysulfobetaine, schizophrenic micelles, sulfobetaines, sulfobetaine, marine antifouling, salting in, salting out, salt responsive, stimuli responsive, conventional micelle, inverse micelle, salt resistance, halophilic, halo-tolerant, haloresponsive.

### Graphical Abstract

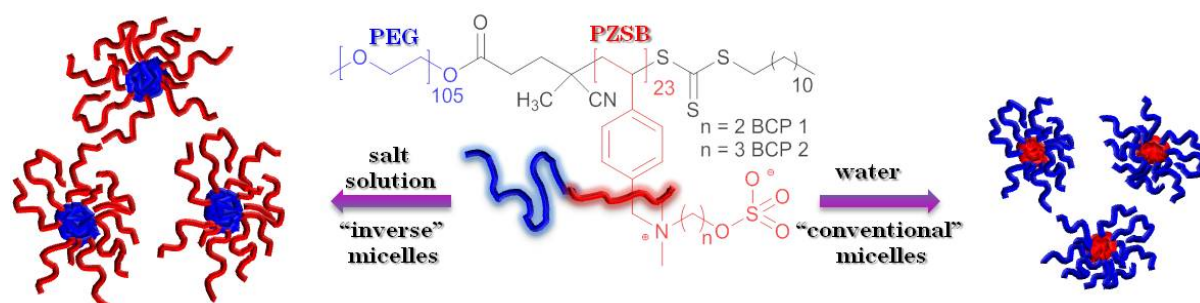

## Dual hydrophilic and salt responsive schizophrenic block copolymers – synthesis and study of self-assembly behaviour

Vivek Arjunan Vasantha,<sup>\*a</sup> Satyasankar Jana,<sup>a</sup> Serina Siew-Chen Lee,<sup>b</sup> Chin-Sing Lim,<sup>b</sup> Serena Lay-Ming Teo,<sup>b</sup> Anbanandam Parthiban<sup>\*a</sup> and Julius G. Vancso<sup>a,c</sup>

<sup>a</sup>Institute of Chemical and Engineering Sciences (ICES), Agency for Science, Technology and Research (A\*STAR), 1 Pesek Road, Jurong Island, Singapore 627833.

<sup>b</sup>Tropical Marine Science Institute, National University of Singapore, 18 Kent Ridge Road, Singapore 119227

<sup>c</sup>MESA+ Research Institute for Nanotechnology, Faculty of Science and Technology, University of Twente, P. O. Box 217, 7500 AE Enschede, The Netherlands.

E-mail: [vivek\\_vasantha@ices.a-star.edu.sg](mailto:vivek_vasantha@ices.a-star.edu.sg); [aparthiban@ices.a-star.edu.sg](mailto:aparthiban@ices.a-star.edu.sg)

### Supporting Information

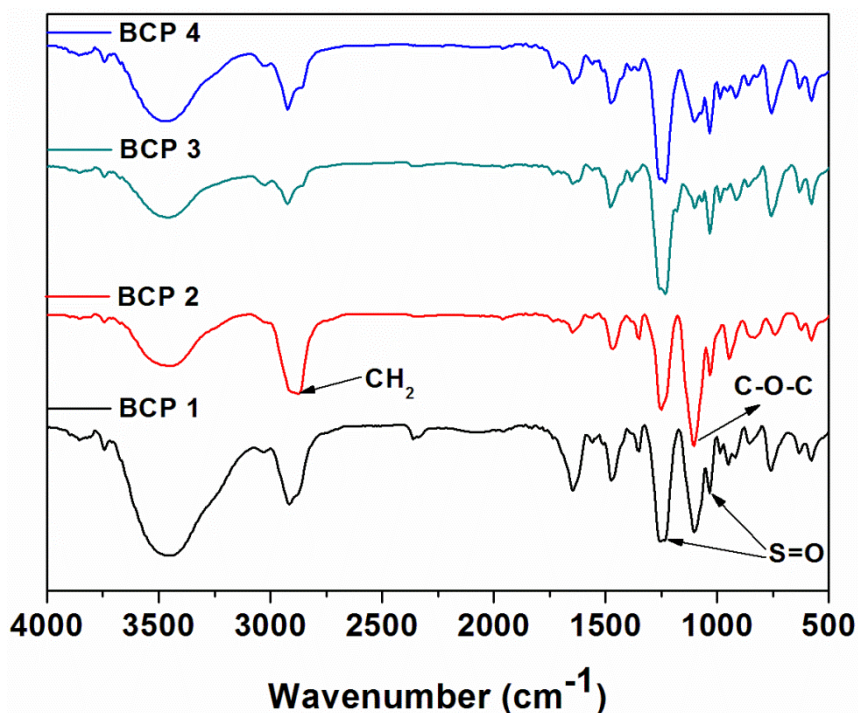

Fig. S1 FT-IR of polysulfobetaine block copolymers.

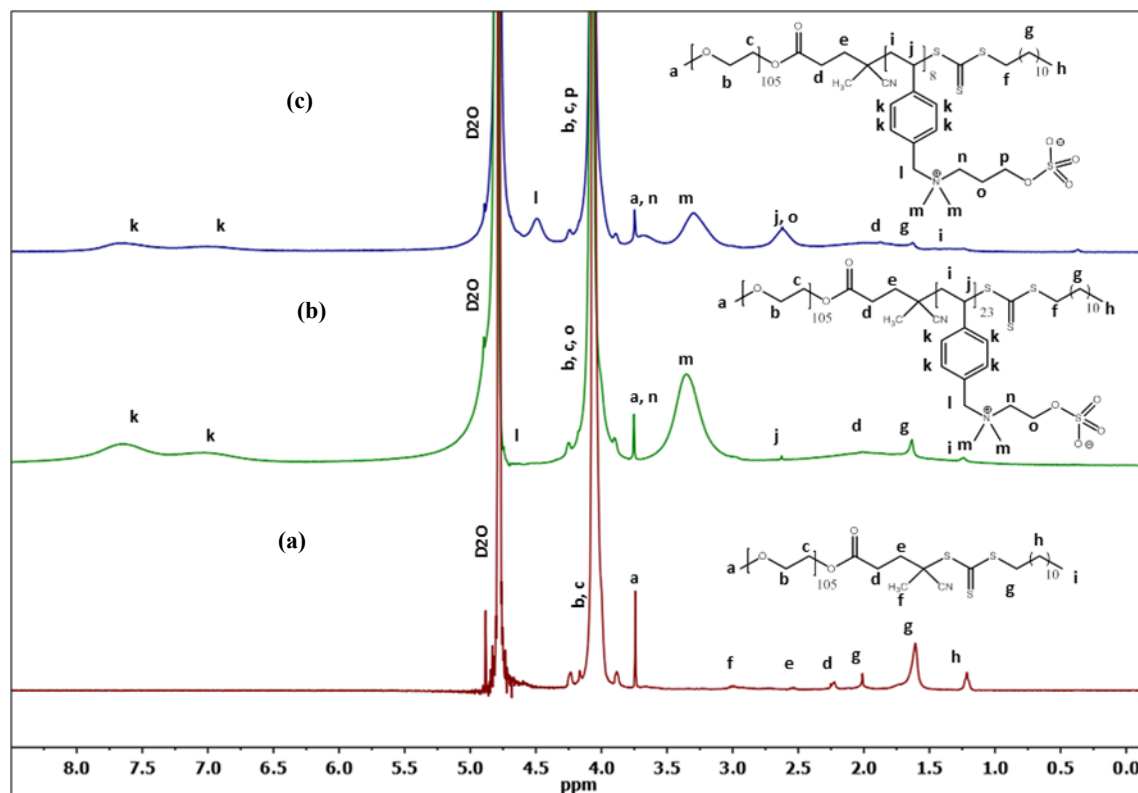

**Fig. S2**  $^1\text{H}$  NMR spectra of (a) PEG-RAFT 1, (b) BCP 1 and (c) BCP 2 in 5 % wt NaCl in  $\text{D}_2\text{O}$ .

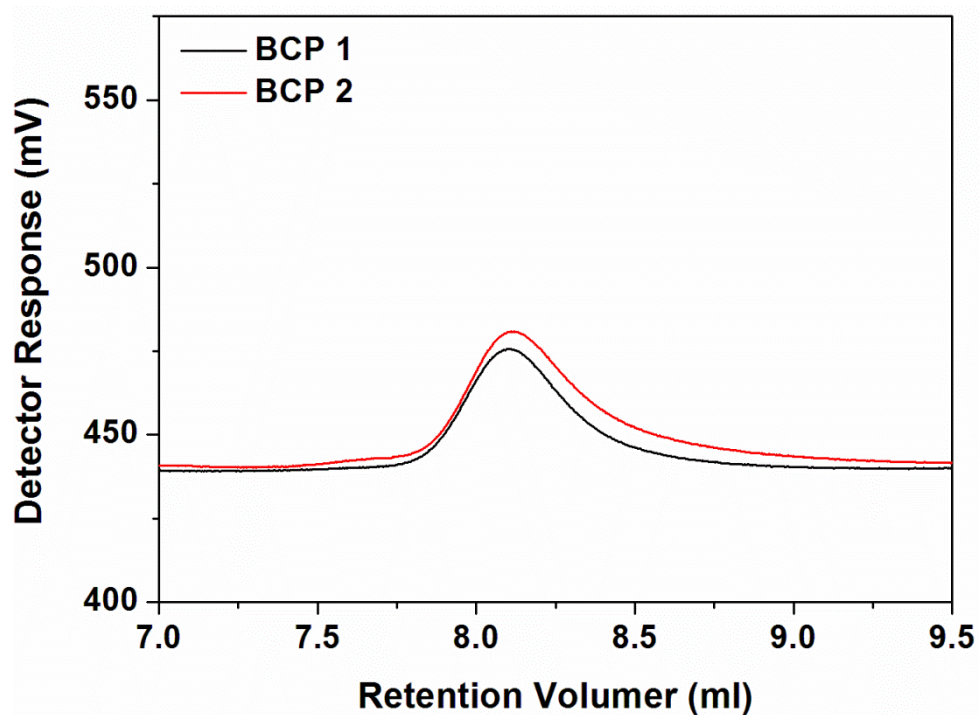

Fig. S3 GPC chromatograms of polysulfobetaine block copolymers.

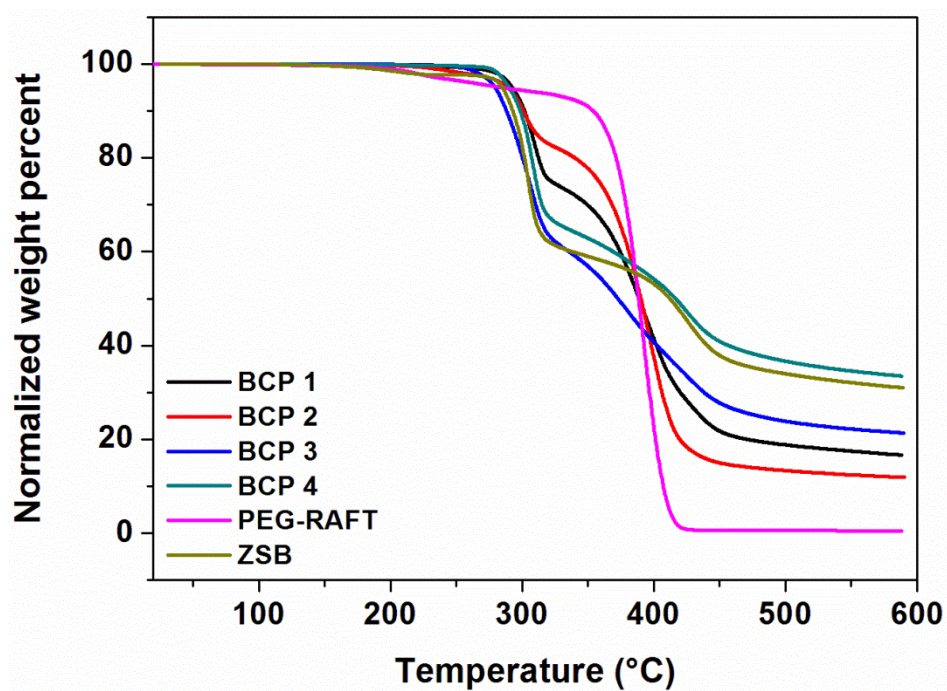

Fig. S4 Thermogravimetric analysis of BCP 1-4, PEG-RAFT 1 and ZSB.

**Table S1.** Melting temperature of PEG blocks in BCPs

| Polymers                | Composition from $^1\text{H NMR}^b$                   | $^c T_m$ (°C) |
|-------------------------|-------------------------------------------------------|---------------|
| <sup>a</sup> PEG-RAFT 1 | (EG) <sub>105</sub>                                   | 59            |
| BCP 1                   | (EG) <sub>105</sub> - <i>b</i> -(ZSB 1) <sub>23</sub> | 59            |
| BCP 2                   | (EG) <sub>105</sub> - <i>b</i> -(PZSB 2) <sub>8</sub> | 62            |
| BCP 3                   | (EG) <sub>19</sub> - <i>b</i> -(ZSB 1) <sub>10</sub>  | 41            |
| BCP 4                   | (EG) <sub>19</sub> - <i>b</i> -(ZSB 1) <sub>24</sub>  | 43            |

<sup>a</sup> PEG-RAFT 2 with (EG)<sub>19</sub> did not show any melting transition in the DSC analysis; <sup>b</sup> refer to experimental section for details on the molecular determination by  $^1\text{H-NMR}$  analysis; <sup>c</sup> melting of PEG block as determined by DSC (heating rate 10 °C/min, N<sub>2</sub> atm.).

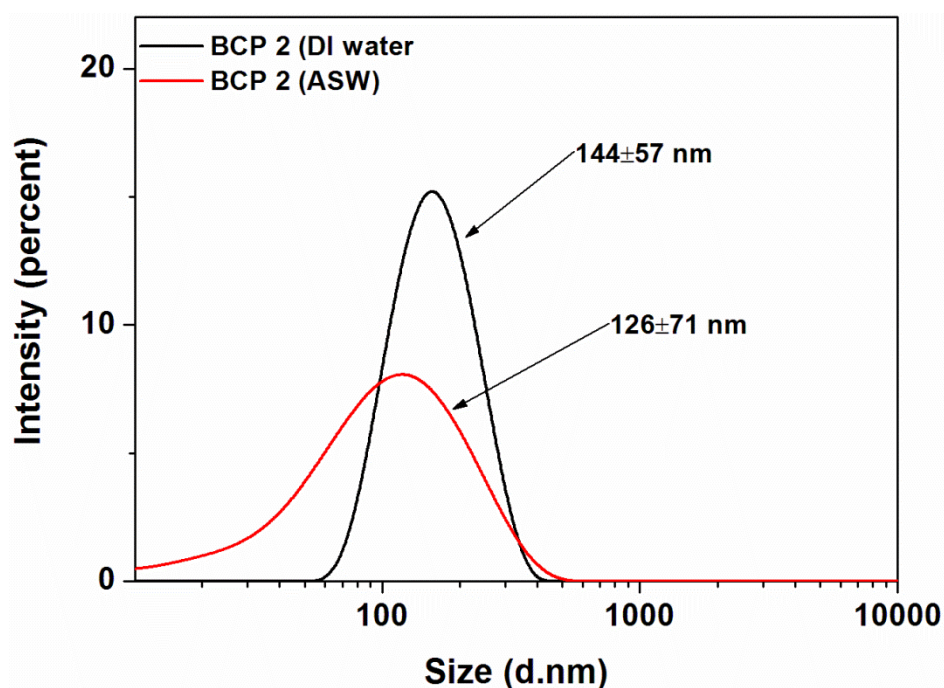

**Fig S5** Size (Z-Average) distribution of micelles of BCP 2 in DI water and ASW.

**Table S2** Summary of particle sizes for BCPs by DLS in water and ASW after two months

| Polymer | Solvents | After two months               |           |                                |           |
|---------|----------|--------------------------------|-----------|--------------------------------|-----------|
|         |          | <sup>a</sup> DLS ( $D_z$ , nm) | PDI (DLS) | <sup>a</sup> DLS ( $D_z$ , nm) | PDI (DLS) |
| BCP 2   | DI water | 45                             | 0.09      | 82                             | 0.2       |
|         | ASW      | 149                            | 0.1       | 126                            | 0.5       |
| BCP 2   | DI water | 144                            | 0.13      | 97                             | 0.4       |
|         | ASW      | 126                            | 0.6       | 116                            | 0.6       |

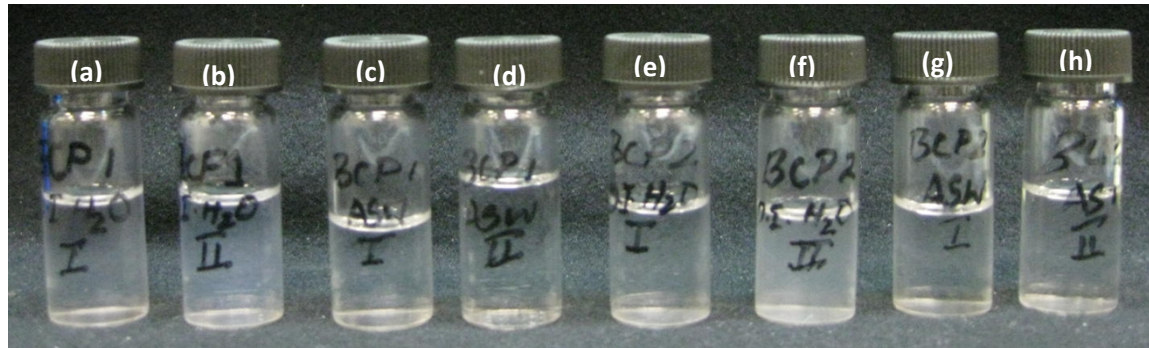

**Fig S6.** Photograph of zwitterionic “conventional” micelles in water BCP 1 (a and b) and BCP 2 (e and f) and “inverse micelles” in ASW (BCP 1 (c and d) and BCP 2 (g and h) (I) as prepared sample and (II) after storing for two months

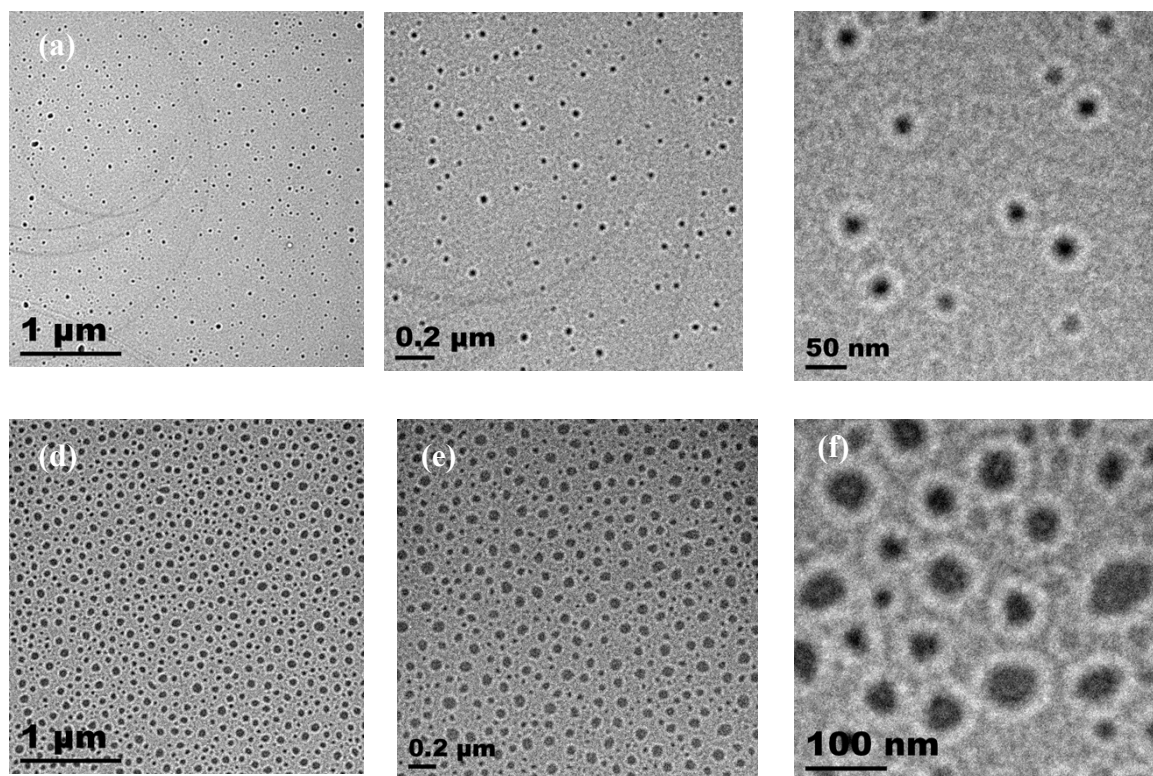

**Fig. S7** TEM of BCP 1 (a, b and c) and BCP 2(c, d and e) in DI water ( 1mg/mL)

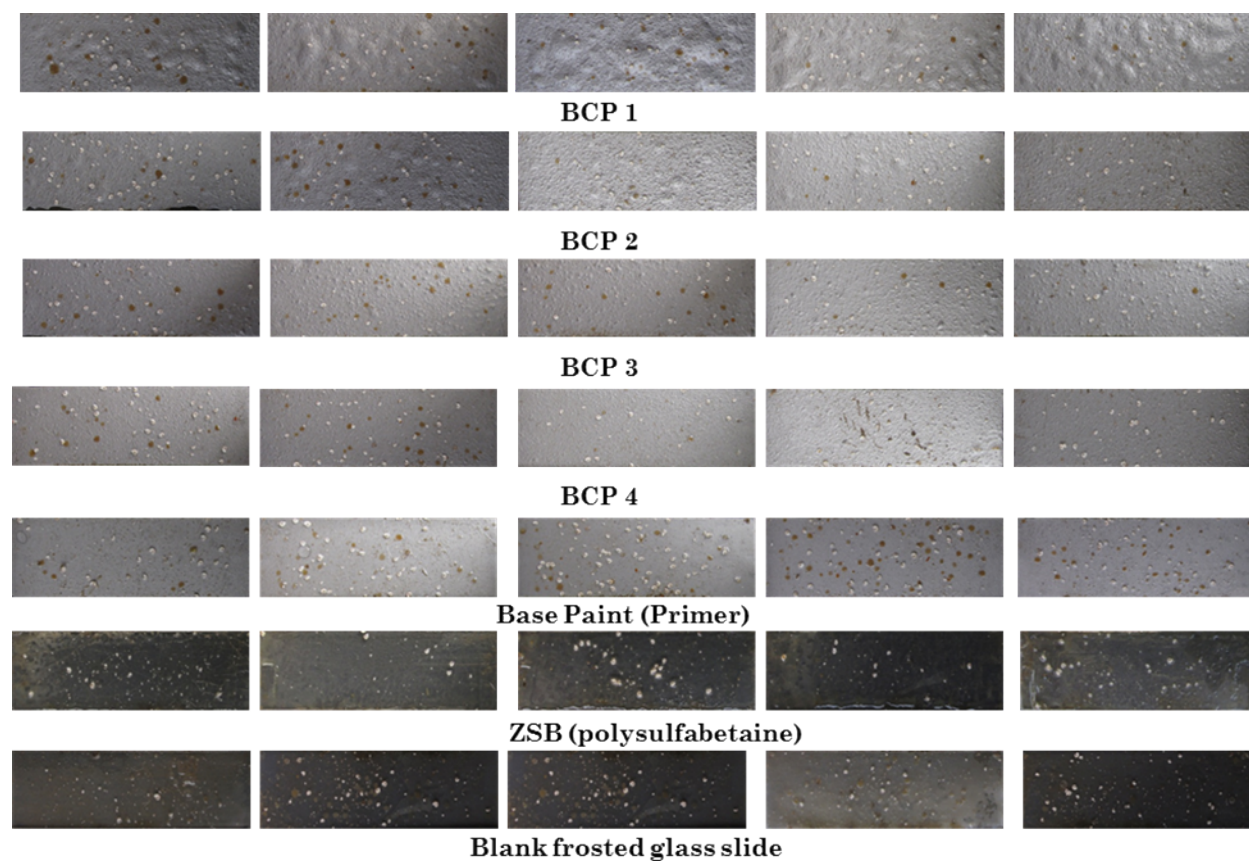

**Fig. S8** Photographs of glass slides after two weeks of immersion in the sea.
